# Supplementary material for: Predicting a graphene-like WB4 nanosheet with a double Dirac cone, an ultra-high Fermi velocity and significant gap opening by spin–orbit coupling
Source: Royal Society of Chemistry journal article supplement (doi:10.1039/c7cp00157f), 2017-01-01
Supplement: c7cp00157f1.pdf [file c7cp00157f1.pdf]

# Predicting a Graphene-like WB<sub>4</sub> Nanosheet with Double Dirac Cone, the Ultra-high Fermi Velocity and Significant Gap Opening by Spin-orbit Coupling

Chunmei Zhang<sup>1</sup>, Yalong Jiao<sup>1</sup>, Fengxian Ma<sup>1</sup>, Steven Bottle<sup>1</sup>, Mingwen Zhao<sup>2</sup>, Zhongfang Chen<sup>3</sup> and Aijun Du<sup>1,\*</sup>

<sup>1</sup>*School of Chemistry, Physics and Mechanical Engineering, Queensland University of Technology, Garden Point Campus, QLD 4001, Brisbane, Australia*

<sup>2</sup>*School of Physics and State Key Laboratory of Crystal Materials, Shandong University, Jinan 250100, China*

<sup>3</sup>*Department of Chemistry, Institute for Functional Nanomaterials, University of Puerto Rico, Rio Piedras Campus, San Juan, PR 00931, USA,*

## Method

The band gap are calculated in the generalized gradient approximation in the Perdew, Burke, and Ernzerhof form (GGA -PBE) PBE calculations<sup>1</sup> (Figure S1), which underestimate the band gap compared with HSE method. A damped van der Waals correction was incorporated using Grimme's scheme<sup>2</sup> to better describe the nonbonding interaction. Monkhorst-Pack k-points<sup>3</sup> of 15 × 15 × 1 were used for sampling in the first Brillouin zone during geometry optimizations of the WB<sub>4</sub> monolayer. All of the atoms were fully relaxed until the residual force and energy converged to 0.001 eV/Å and 10<sup>-6</sup>eV, respectively. To make sure of the dynamical stability of the obtained structures, phonon dispersion analysis was performed by the finite displacement method<sup>4</sup> using the Phonopy code<sup>5</sup> interfaced with the density functional perturbation theory<sup>6</sup> as implemented in VASP. In phonon calculations, an increased plane wave energy cutoff of 500 eV was employed, accompanied by more stringent convergence criteria for energy (10<sup>-8</sup> eV) and force (0.001 eV/Å).

Next, we estimate the elastic limit of the WB<sub>4</sub> monolayer by calculating the strain-stress relation subject to a biaxial tensile tension. The maximum stress is the ultimate strength that a material can withstand while being stretched, and the corresponding strain is called the ideal strain strength, which is determined by the intrinsic bonding strengths. The maximum stress that 2D WB<sub>4</sub> can withstand while being stretched is about 3.5N/m with the corresponding ideal strain of 17% (Figure S2, S3), which is comparable to that of other well-known 2D materials such as MoS<sub>2</sub> (20%)<sup>7</sup> and graphene (24%)<sup>8</sup> suggesting the high mechanical strength and robust of two Dirac cone of the monolayer.WB<sub>4</sub>.

Ab initio molecular dynamics (AIMD) simulations with canonical ensemble was performed to evaluate the thermodynamic stability. The structure did not collapse with time change for 10ps at 300 K and 1000K (Figure S4), which confirms our structure is stable at both room temperature and high temperature.

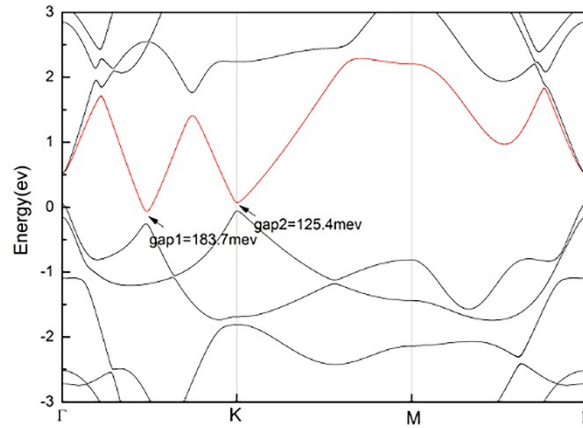

Figure S1. Calculated SOC band structures for 2D P6/mmm WB<sub>4</sub> with PBE method (183.7 meV for cone 1 and 125.4 meV for cone 2, respectively).

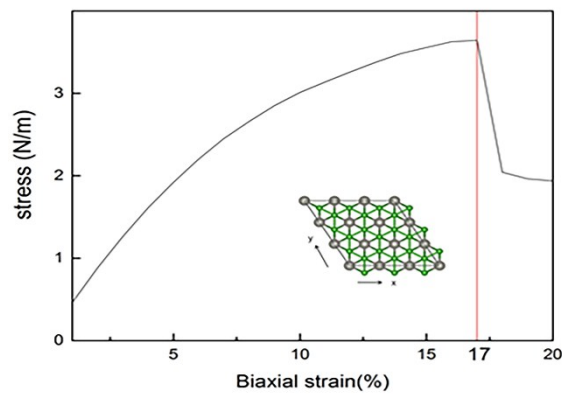

Figure S2. The stress in the WB<sub>4</sub> monolayer subjected to biaxial strain. The structural snapshots under 17% strain. The strain directions are marked by x, y arrows.

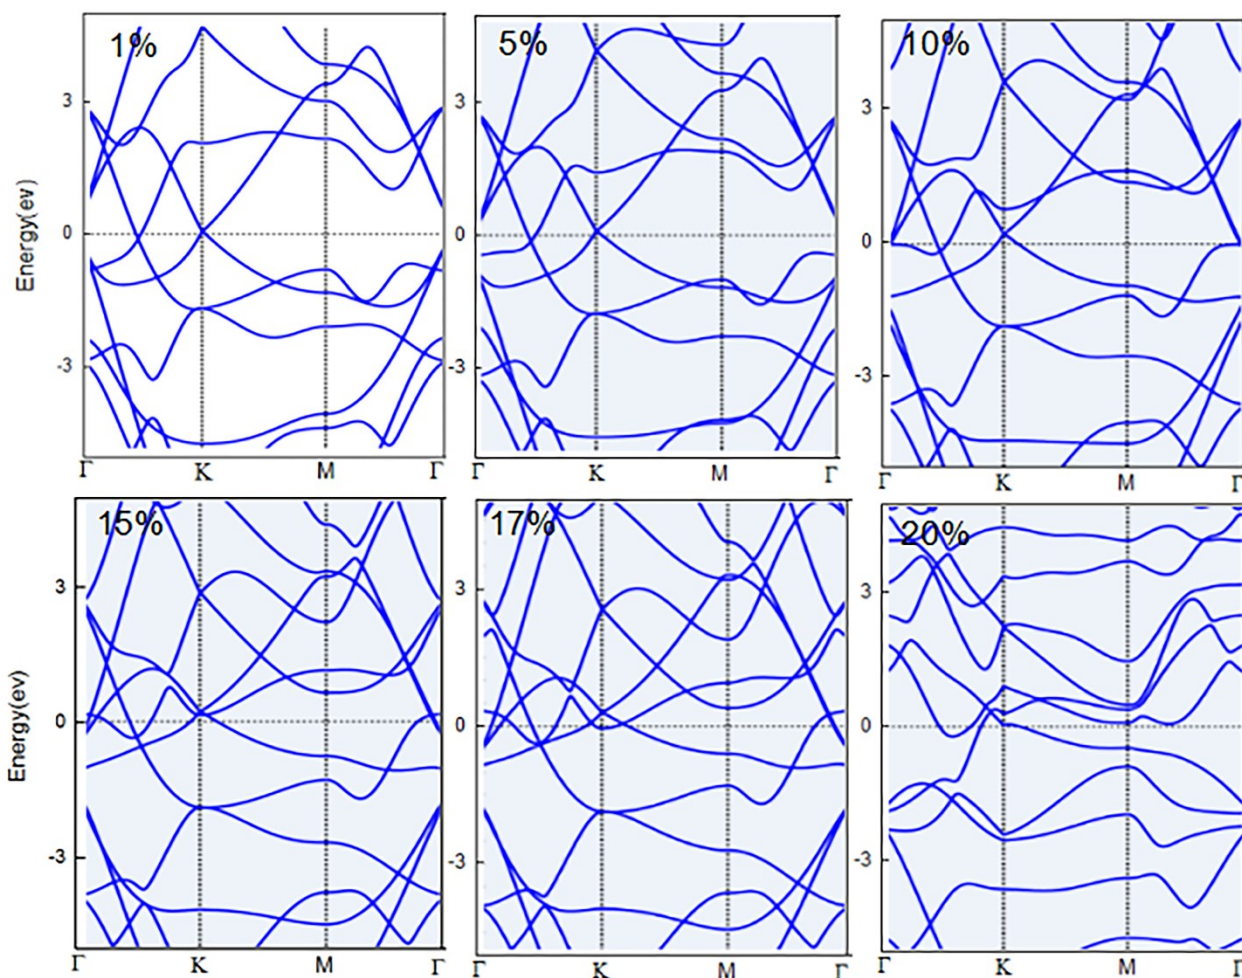

Figure S3, The band structure changes when 1%, 5%, 10%, 15%, 17%, 20% biaxial strain is applied on the monolayer  $WB_4$ . Biaxial strain is observed to shift the Dirac points without affecting the metallicity while preserving the Dirac points until 17%, which gives a clear description of the robust of Dirac cone.

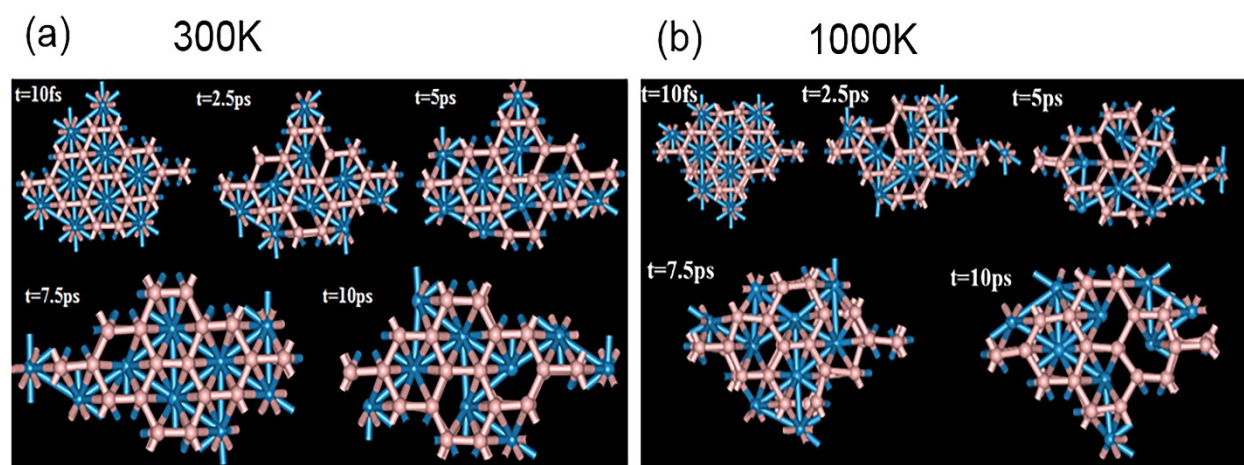

Figure S4. The thermodynamic stability at (a) 300K (b) 1000K of monolayer  $WB_4$  are evaluated through Ab initio molecular dynamics (AIMD) simulations. The figures present configurations from 10fs to 10ps.

1. J. P. Perdew, K. Burke and M. Ernzerhof, *Physical review letters*, 1996, **77**, 3865.
2. S. Grimme, *Journal of computational chemistry*, 2006, **27**, 1787-1799.

3. H. J. Monkhorst and J. D. Pack, *Physical review B*, 1976, **13**, 5188.
4. K. Parlinski, Z. Li and Y. Kawazoe, *Physical review letters*, 1997, **78**, 4063.
5. A. Togo, F. Oba and I. Tanaka, *Physical Review B*, 2008, **78**, 134106.
6. X. Gonze and C. Lee, *Physical Review B*, 1997, **55**, 10355.
7. T. Li, *Physical Review B*, 2012, **85**, 235407.
8. B. Mortazavi and G. Cuniberti, *Nanotechnology*, 2014, **25**, 215704.
